# Supplementary material for: Targeting KDM4C enhances CD8+ T cell mediated antitumor immunity by activating chemokine CXCL10 transcription in lung cancer
Source: HighWire-hosted journal article supplement (doi:10.1136/jitc-2021-003716), 2022-02-01

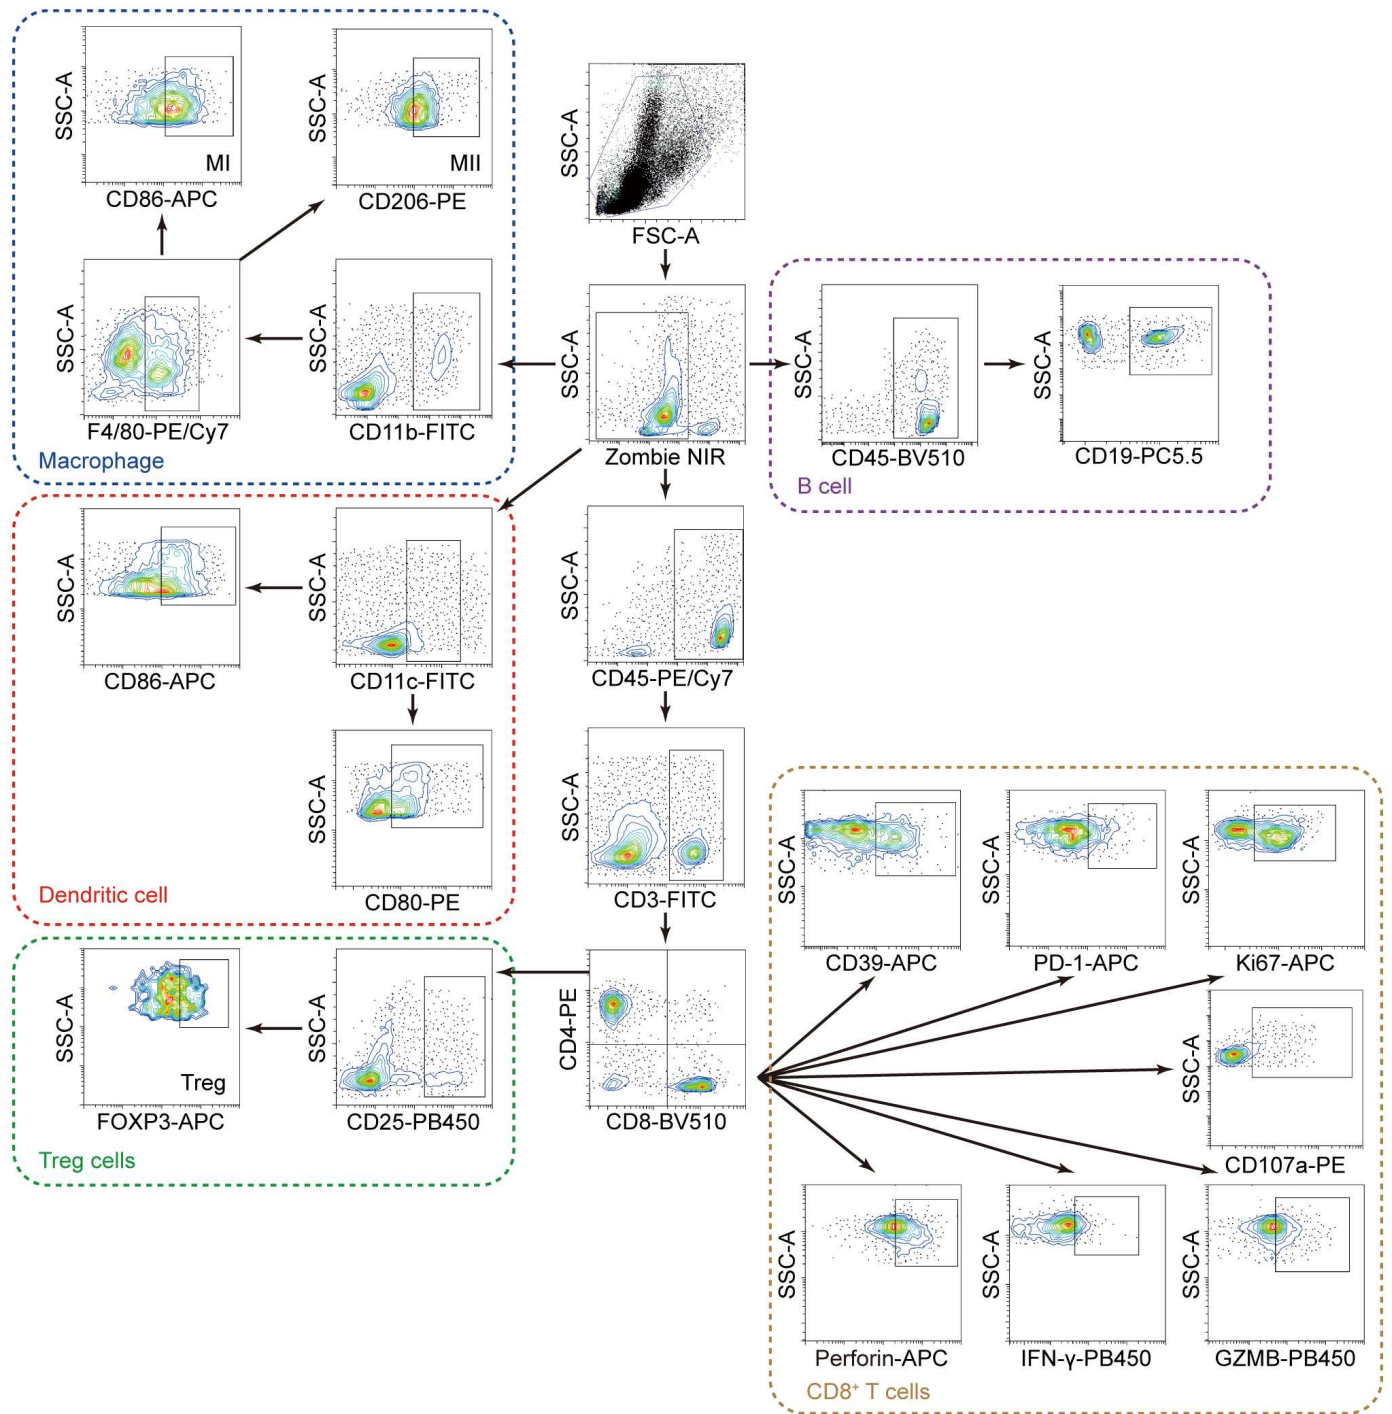

Supplement: jitc-2021-003716supp003_data_supplement.pdf [file jitc-2021-003716supp003_data_supplement.pdf]
